# Supplementary material for: Clinical Stage III NSCLC Patients Treated with Neoadjuvant Therapy and Surgery: The Prognostic Role of Nodal Characteristics
Source: MDPI journal article supplement (doi:10.3390/life12111753), 2022-11-01
Supplement: s1 [file s1]

Supplemental Table S1. Cancer Specific Survival. Univariable and multivariable analysis.

|                                  | Univariable | Multivariable |                     |
|----------------------------------|-------------|---------------|---------------------|
|                                  | p-value     | p-value       | HR (95%CI)          |
| Age                              | <0.001      | <0.001        | 0.918(0.885-0.953)  |
| Sex                              | 0.726       |               |                     |
| N2 station previous therapy      | 0.904       |               |                     |
| Subcarinal involvement           | 0.856       |               |                     |
| Type of therapy                  | 0.637       |               |                     |
| yc Stage                         | 0.168       |               |                     |
| ycT                              | 0.318       |               |                     |
| ycN0N1                           | 0.035       | 0.004         | 0.286(0.122-0.669)  |
| Type of resection                | 0.003       | 0.812         | 0.893(0.353-2.263)  |
| pTNM                             | 0.099       |               |                     |
| Histology                        | 0.132       |               |                     |
| pT                               | 0.260       |               |                     |
| pN                               | 0.686       |               |                     |
| pN2                              | 0.200       |               |                     |
| Downstaging                      | 0.713       |               |                     |
| Lymph-node downstaging           | 0.539       |               |                     |
| Complete response                | 0.119       |               |                     |
| Metastatic lymph-node            | 0.494       |               |                     |
| Numer of nodal stations removed  | 0.503       |               |                     |
| Number of lymph-nodes removed >6 | 0.134       |               |                     |
| Adjuvant therapy                 | 0.057       | 0.027         | 2.2628(1.115-6.194) |
